# Supplementary material for: MicroRNA Profiling of B Cell Subsets from Systemic Lupus Erythematosus Patients Reveals Promising Novel Biomarkers
Source: Int J Mol Sci. 2015 Jul 27;16(8):16953–65. doi: 10.3390/ijms160816953 (PMC4581178; doi:10.3390/ijms160816953)
Supplement: Supplementary file 1 [file ijms-16-16953-s001.xlsx]

## Sheet: Table S1
Table S1. The potential gene targets for differentially expressed miRNAs in SLE patients versus healthy donnors naive B cells
hsa-let-7d	hsa-let-7e	hsa-miR-181c	hsa-miR-223	hsa-miR-29b	hsa-miR-29c	hsa-miR-324-5p	hsa-miR-328	hsa-miR-362-3p	hsa-miR-494	hsa-miR-744
C12orf49	SYT11	PTGS2	FOXO1	CHRNB2	CHRNB2	KIAA1486	LOC130074	FAM90A1	TEX101	ADAMTSL1
GDAP2	ZNF587	CNOT6L	FAM120AOS	TET2	TET2	PYGO2	RALGPS1	DKFZp547H025	7A5	DNAJC16
HMGA2	BLOC1S1	AFF2	RSBN1L	ISG20L2	ISG20L2	GANAB	TMEM184A	CALCRL	NOPE	ACCN2
BAG1	STAT2	TMEM30A	BCLAF1	KLHL28	KLHL28	QRSL1	RNF165	VAPA	AQP3	C11orf75
C3orf38	PRIM2	PRRC1	FLJ20309	XPO4	XPO4	FBXL18	ZNF784	PRKCE	FNBP1L	CALML5
EEF2K	LOC388335	ZFYVE26	AKAP6	FOXJ2	FOXJ2	FAM43A	CACNA1A	WDR22	PTPN12	RBPMS
TRIM32	PLA2G2F	NRAS	GTPBP8	SLC16A14	SLC16A14	FOXRED2	CTDSPL	CARD8	SOCS6	ARHGAP6
RG9MTD2	ENAH	ERLIN2	USP42	RFXDC2	RFXDC2	RAGE	KLF15	SLC17A4	DBR1	SPON2
PPP1R12B	ARNT2	JRK	DUSP10	RHOBTB1	RHOBTB1	RND3	LMF2	TMCO7	SHOC2	OPN4
C10orf6	TNFRSF1B	ULK1	PITPNA	HMCN1	HMCN1	EGR3	ABCG2	PDS5A	ARMCX2	SPINLW1
C1orf25	COX18	SLC24A3	CALML4	SCML2	SCML2	MAPK8IP3	C6orf106	C1orf103	AKAP8	ATP2A2
ABCB9	GOLT1B	MKLN1	PLCXD2	TET3	TET3	UBXD1	TMEM32	SP6	SAP18	FAM32A
ARHGEF15	C1orf212	TXNDC15	ANKH	ARSB	ARSB	CECR2	MNT	CREB5	NUDT21	LOC283331
FAM104A	FAM134C	IL2	KSR2	PMP22	PMP22	ANGEL1	USH1G	MKRN1	C5orf32	GNG13
ZNF605	PUNC	EXDL1	BRPF3	SERPINB9	SERPINB9	TFF3	KSR2	FAM126A	GPR158	CNP
SUOX	C1QTNF3	WIF1	ALCAM	EIF4E2	EIF4E2	ZNF324B	MTCH1	ZFHX4	PCLO	FAM109B
ICOS	TMEM192	AQP9	NUCKS1	FAM105B	FAM105B	OTUD7B	ST3GAL3	THRA	KIAA0495	SEPT2
C11orf57	ZNF417	COL19A1	KCNJ9	HAPLN3	HAPLN3	LYNX1	MAP3K7IP1	TMEM132B	ZC3H7A	RTN4RL1
PBX3	PHACTR4	AHR	WDR68	C1orf96	C1orf96	KLK2	TTC7A	PLCXD2	SLC39A6	MYO7B
TFEC	SLC19A3	CNOT4	ANXA6	COL4A5	COL4A5	KIAA0515	C5orf24	SNX27	FSIP1	IL1F5
C19orf39	RNF207	CPOX	GTSF1	IL1RAP	IL1RAP	C20orf11	KCND3	IL8RA	CBLL1	CALY
PPP1R15B	H6PD	TGIF2	DTX4	IREB2	IREB2	URM1	HTR4	BCL9	ALG8	ARFRP1
ASB4	NUDT15	ZNF654	PSD3	ACPL2	ACPL2	ERC2	C16orf63	POT1	RDH10	KIAA1602
SMARCC1	AASS	ACTN2	SPINK5L3	ZNF346	ZNF346	STX16	CLINT1	PLAG1	G6PC	ATP1A4
ZNF354A	DDA1	ARL5A	EPM2AIP1	COL3A1	COL3A1	ICOSLG	SLAMF7	LTF	ATP8A1	GPC1
MARS2	RHPN2	PPP3R1	WDR64	NASP	NASP	EMILIN2	SLA	SMC2	SLC7A11	CLDN5
FMNL3	CCDC113	PARK2	MYH10	COL2A1	COL2A1	SH3BP5L	RPL31	MGC4655	GALNT11	RAPGEF1
MTMR3	SOCS4	BTBD3	LIX1	KIAA0895	KIAA0895	ELF3	KIAA0556	ST6GALNAC3	C20orf108	CORO7
EEA1	TRIM65	DEPDC6	CENPN	GABRP	GABRP	POU3F1	FBXO9	C3orf60	C7orf42	ORAI2
CHRD	CBL	CLCC1	ANTXR1	RNF39	RNF39	LFNG	DERL3	APOOL	CCDC149	KCNJ1
HOOK1	PIK3C2B	DIP2C	FOXO3	HBP1	HBP1	USP36	RUNX1T1	SEMA3E	ZNF587	CBL
AMOT	RPUSD3	BTRC	SYAP1	MEX3B	MEX3B	ATP8B1	ZMIZ1	MGC3196	C1orf149	METTL5
TSC1	MCPH1	PCDH19	FAM13A1	IGF1	IGF1	NAALADL1	PDLIM5	LASS3	EVI2B	HECTD3
LRRC17	SMC1A	LRP11	NMNAT2	SESTD1	SESTD1	FXYD6	P2RY6	FLJ25778	ELOVL5	DES
DOCK3	IRS2	PAPD5	ENAH	C1orf135	C1orf135	UCN	SBK1	SOHLH2	EIF1AY	DDX23
HAAO	SEMA4G	SPOCK3	ZHX1	NAP5	NAP5	C20orf160	KNCN	SPTBN2	ZNF292	AP3D1
HMGA1	CRTAM	RFC3	WDR62	C5orf13	C5orf13	ZNF697	CHDH	HIPK2	PDIK1L	FBLN2
PBX1	DERL3	UBE3C	ACVR1C	BACH2	BACH2	SH2D5	SCRN1	C18orf19	PITPNM3	FAM107B
PPAPDC2	BACH1	RAI14	SFRS12	SLC12A8	SLC12A8	CCDC64	NSL1	ERC1	OBFC2A	SH3BGRL3
C1QTNF1	ANKRD49	PHOX2B	SOCS5	PCGF3	PCGF3	ESRRA	C10orf56	PUNC	PITPNB	CXCL12
ZCCHC3	TRIM67	DEK	KPNA1	PI15	PI15	CD6	KIAA1147	GABRB2	PGAP1	UNC5A
CD59	LHCGR	CBX7	SPTLC2	PDPN	PDPN	GIMAP8	CEP350	CTF8	MRPL45	WBSCR18
RSPO2	MXD1	SOCS4	NUP210	C11orf54	C11orf54	S100B	LRRTM4	CRY2	MBNL2	KRT6C
RIOK3	C1orf213	WDFY1	TAP2	IFI30	IFI30	FAM83H	CRK	PALM2	GPRC5B	KIAA1303
BSDC1	CYP19A1	RAB3IP	ATP10D	AICDA	AICDA	ZC3H7B	PEX6	KIAA0323	MSL2L1	AP2A2
SLC8A2	ZNF783	HMGB2	UHRF1BP1	KIAA0644	KIAA0644	ELFN1	ZSCAN22	LBH	F11R	WDR3
LIN28B	C22orf9	SYNE1	ZNF480	ANKRD13B	ANKRD13B	TMEM101	TFEB	ZBTB8	SCYL1BP1	SGSM2
RNMT	TP53	LMO3	SNTB2	PAN2	PAN2	HOMER3	TBKBP1	SCRT1	G3BP1	AATK
SLC31A1	SEC14L5	SPTLC1	PRKCE	VASH1	VASH1	PSCD2	WRNIP1	RBM15B	SLC1A2	VGLL4
ATP6V1F	SLC35A2	NUP50	RPS6KB1	MFAP3	MFAP3	KLC2	GNAZ	RMND1	ZKSCAN2	IQSEC2
LIMD2	MYCBP	TAF15	ZC3H6	HIF3A	HIF3A	C19orf60	BTN3A2	BAHCC1	MUC15	CNPY3
PRLR	GIPC1	ARNT2	C10orf97	MAGOHB	MAGOHB	C3orf65	COL11A2	ZNF626	ZRANB3	EEF1A2
PARD6B	SLC5A9	SGK3	NEBL	PLAG1	PLAG1	PDZD3	ATF7IP2	CHRNA2	RNF146	UPF1
GRPEL2	ELAVL1	C1orf161	MTM1	SLC22A7	SLC22A7	TIMM13	IER5	TIE1	IGF2BP1	LYPLA3
CPM	DEF8	BRAP	PAPOLB	GPATCH2	GPATCH2	DCHS1	MAGEC2	ZNF740	MTX3	IL11
COL14A1	HIC2	MTX2	C22orf30	BRWD1	BRWD1	KLF6	ZBTB4	ARIH2	TLR6	WDFY2
CCR10	ZNF473	HK2	KLF12	PDE7B	PDE7B	SRGAP2	LSS	PDPR	PRKAA2	SLC45A4
CPD	KIAA1539	ATXN3	SCARB1	KLF12	KLF12	PGF	LARP5	CXorf36	PRDM4	HARS
SMCR7L	PRKAA2	RCBTB2	MYO1B	CYCS	CYCS	CALML5	PEX12	ZC3H4	HCFC2	WWP2
RUFY3	AGXT2	WTAP	XRRA1	CLEC2D	CLEC2D	MYCBP2	VPRBP	PDCD2	ROCK1	SURF4
BACE2	HIF3A	ACSL1	GPR137C	HMGCS2	HMGCS2	MGMT	HTF9C	NAPEPLD	C8orf46	SPTBN4
RFWD3	GPR132	ATM	MANBAL	NAV1	NAV1	HES5	MCTS1	RBM12	ALK	ZNF629
UBE2G2	HS2ST1	GTSE1	AKAP10	CLCN2	CLCN2	CTXN1	P2RX6	GSTM3	GDAP2	REEP2
C15orf41	ZNF784	ACYP1	MIB1	MGC21874	MGC21874	HP	POU2F2	EGFLAM	C22orf30	PLD4
COL24A1	LMX1A	ZBTB43	OGN	COL6A3	COL6A3	PHOX2A	AGPAT2	RFXAP	IL23R	PDGFRB
SNAI3	PRRX1	KCNB1	TGFBR3	SGCB	SGCB	GJB3	IPO9	HIPK1	ZNF233	USP40
VEZT	IPO9	OSBPL3	PHF20L1	CGREF1	CGREF1	HCCA2	MGAT4B	ZNF137	SHROOM4	MAN1B1
ACTR10	ZNF566	KCNA1	HOOK1	GPR37	GPR37	FAM18B2	GATS	ZNF304	SEMA3E	HOXA3
MGAT4A	C6orf168	FRMD8	PLD5	ZNF396	ZNF396	ENOSF1	GSK3A	SOX17	TMEM154	SLC9A3R2
VPS33A	GDAP2	FDFT1	PKP4	C9orf123	C9orf123	A2ML1	REPS2	FAM46C	KIAA0776	CENTA2
PVR	H2AFV	IFT81	SLC8A1	LAMA2	LAMA2	REN	RHPN1	JAGN1	WDR1	PMPCA
GALC	SFTPB	NEBL	NLRP14	CLTC	CLTC	HPR	PLAA	NFASC	SPATA16	PELI3
UGT3A1	ZC3H3	OPN5	SLC4A4	C3orf15	C3orf15	APEH	BTBD12	ACSF3	TEX15	BIN1
PHC3	KIAA1919	SS18L1	ZNF260	COL4A1	COL4A1	IL18BP	SH3PXD2B	ELMO2	ENPEP	CACNA2D4
GGA3	AMT	ZFX	SLC7A8	IL1RL1	IL1RL1	ZBTB22	STARD7	ABR	TRPS1	ARHGEF1
KCNK6	MLL2	VGLL3	RND3	KIAA2022	KIAA2022	SEL1L2	SLC25A22	ZNF605	SLC26A3	OSBPL5
GALNT13	NAGA	PSG9	PKNOX1	RNF19A	RNF19A	FGFBP1	AHRR	CACNA1B	CALR3	RCN3
PLDN	ZNF197	OSBPL2	MAP4	TCL1A	TCL1A	TMEM138	CD300A	PTGDR	HOMEZ	MYT1
ZNF248	NQO1	WDR23	TMEM184A	LEPRE1	LEPRE1	C9orf3	C7orf42	NUFIP2	MORF4L2	WBSCR17
ZNF577	NGF	ANUBL1	SLC11A2	GSTA4	GSTA4		PTEN	UBE3B	LOC253012	EDNRA
WDR65	GABBR2	REPS2	YWHAG	PLXNA4	PLXNA4		NFKBIB	RHPN2	GPNMB	SCN1B
C12orf4	TTC31	TGFBI	PURB	ADAMTS10	ADAMTS10		FAM89B	DLST	TSHB	PPP2R5B
RAD9A	CLCN5	ENDOD1	FBXO8	PTAR1	PTAR1		LFNG	SELI	ANKRD22	RGMA
C1orf161	MRM1	HSD3B1	CBFB	EFNA5	EFNA5		CDT1	CYP11B2	ATP8A2	PNMAL2
SLC5A9	PPT2	CCDC88C	PKN2	C1orf69	C1orf69		C22orf29	WDFY1	F2R	GMEB2
C6orf106	RAB3GAP2	C15orf2	MAEL	CD276	CD276		LYPD1	NFE2	RAB27A	THY1
TMED5	KIAA1305	ATG5	PSCDBP	ZNF37A	ZNF37A		ZBTB7B	ZNF655	POLR3G	GFRA2
C13orf1	CREB3L2	ANKLE1	FAM46A	NPAS3	NPAS3		KIAA0329	PRKACB	GULP1	ZIC4
FKBP4	SYT7	GOLGA8A	MPP7	ABCB6	ABCB6		NEURL	FAM53C	EDN1	ZNF628
GNG5	FBXW2	FBN2	COX19	PTP4A1	PTP4A1		LCP1	LOH12CR1	TDP1	KRT71
PRSS22	GALE	LASS3	PRICKLE2	IL1F5	IL1F5		EDG5	NAT13	AKAP7	NBL1
OPRM1	ABCC5	FLJ32549	INPP5B	TTC30B	TTC30B		DAAM2	C10orf137	EIF2C1	DAB2IP
KLF9	DAGLA	SNX13	BMP8A	COL1A2	COL1A2		C19orf25	SETD7	BOLL	PHKA2
WDR42A	PARVB	PDE11A	WBSCR17	MCL1	MCL1		KCNJ11	NANOS1	C15orf29	RFC2
ACP1	SERF2	PHLPPL	CREB1	MBTD1	MBTD1		NFIX	CDCA4	C10orf141	KLC2
TARBP2	STEAP3	TMSB4Y	KL	ATAD2B	ATAD2B		MMAB	C2orf53	SLC38A9	KIAA0664
TMEM104	C14orf28	STEAP4	SYT1	SUV420H2	SUV420H2		SHANK2	PHC3	PUS7L	DLGAP4
UNC5A	FCHSD1	AASDHPPT	PLEKHH1	TNFAIP3	TNFAIP3		RBM19	PDCD6IP	TFPI	PITPNA
RNF20	PUS7L	OSBPL1A	ZNF271	ICOS	ICOS		ATPAF1	ANKRD13A	UGT2B17	MIER2
DCN	EGR3	PTEN	RHOB	PITPNM2	PITPNM2		NBEAL2	VENTX	CCDC4	LPHN1
C3orf64	KIAA0323	HOOK1	RAB8B	GLIS2	GLIS2		UBAP1	AKT3	WWC3	MMP25
DKK3	PTPRB	UBE2J1	WDR77	DDA1	DDA1		KCNT1	FRMD6	SLC46A3	FLYWCH1
TMPRSS2	SLC1A4	ZDHHC3	ACVR2A	KIF26B	KIF26B		SEC14L2	SLC2A2	CREM	MYL6B
CHST5	SNX6	SCAPER	MRPS17	DDX3X	DDX3X		KIAA1755	OLA1	SMURF2	TBC1D25
POU2F2	TRABD	ITGB8	RNF145	NSD1	NSD1		INMT	SNX5	GLIS3	DKFZp761E198
SPOP	KCNJ11	PDIA6	RANBP3L	PDGFC	PDGFC		SLC7A5	PRKAR2B	BCL2L15	SAMD10
FKBP10	KCNA6	MAOA	SMG6	CCNJ	CCNJ		COX19	SPG21	SFXN1	NALCN
TBC1D13	C5orf40	CYP26A1	NUDT12	CASP8	CASP8		ACSS2	ZBTB46	SHANK2	GAS8
PIGA	KLHDC8B	ACVR2B	AIPL1	LSM11	LSM11		C1orf21	GLE1	C7orf58	ERF
WDR51A	ACVRL1	FBXW2	MED11	NAPB	NAPB		AFAP1	ATG10	ZNF396	C1orf183
PDP2	MFSD4	BRD1	GPR85	DPYSL5	DPYSL5		ACCN4	NYX	CD28	C17orf55
GREB1	FBXW4	ZBP1	EIF4E3	NDST1	NDST1		ABCB8	C1orf27	TMEM46	MAFK
SLC20A1	SLC22A23	AKAP7	PPARA	SH3GLB1	SH3GLB1		RAC2	TLR4	POF1B	ATAD3C
AVEN	RBM19	RABGEF1	LMO4	METAP2	METAP2		ZIC1	FRMD8	SLC12A6	ZNF385A
MFSD8	TRAPPC1	DDX3Y	SLC39A14	OTUD4	OTUD4		VPS37C	KLF11	PSD3	RGS16
GPR137	QARS	KCNK10	ARMC1	C10orf55	C10orf55		MBTPS1	IRF8	SH3MD4	ATG9B
TP53INP2	C18orf21	YTHDC1	PIGH	SPINT1	SPINT1		LIMD2	RPL15	NFAT5	BBS1
YBX2	WIPI2	TPRG1	CYorf15B	ATP5G3	ATP5G3		CDIPT	MCM5	TMPO	GSTM5
SLC25A24	NAT14	C4orf15	NFIA	MOBKL1A	MOBKL1A		CLDN11	BLCAP	ZMPSTE24	TNFSF12
ZNF512B	ISG20L1	KDELR3	ACTA1	DGKD	DGKD		PACS2	LOC338809	USP14	HNRPUL2
SOCS1	TET3	NMT2	C18orf54	IMPACT	IMPACT		MAX	APOBEC2	KIAA1199	DLG4
AKAP6	CHIC1	SSH2	PCNX	MAP6	MAP6		PHF13	MET	CMPK2	NXNL1
ATP2B1	TAF9B	PRTG	PTBP2	AKT3	AKT3		EMX1	LMF1	TBL1Y	GIPC1
C20orf72	ICMT	CTDSPL	SEPT10	ZDHHC5	ZDHHC5		ZC3H4	AOC3	TGOLN2	PRKCG
KIAA0776	INTS2	IFT80	FAM29A	TFEB	TFEB		NFIC	RAMP3	PROS1	PPFIBP2
ITK	ROBO4	SFT2D1	SLC25A32	DYM	DYM		ZNF313	TGFBI	LRRFIP2	TRIM54
AGPAT9	IGF1	RASSF2	TBC1D17	PPIC	PPIC		FADS2	WNT2	IRGQ	ACBD4
RFC1	GPIHBP1	SGK269	MSRB3	FRAG1	FRAG1		ASB1	C4orf42	GALR1	USF2
DYRK1A	TMEM1	SELT	MX1	TMEM141	TMEM141		RUNX3	RNF41	CALN1	CLDN15
LDB3	SNX1	ARF6	MMAA	C12orf40	C12orf40		PDCD1	ARSD	PCDH19	CXCR3
SMAP2	SERPINB9	MAGI3	ROR2	GLT25D2	GLT25D2		HOXB4	TP53RK	DNAJC6	BCAS4
PKIA	ZNF273	MTMR1	ProSAPiP1	CEACAM1	CEACAM1		FLJ45224	ITPR1	GOLIM4	C16orf13
PNKD	PACS2	NOS1AP	CLDN8	DNAJB7	DNAJB7		SEPN1	CRMP1	FGL2	CTXN1
C1orf2	PAG1	KCNA6	ARMCX1	SCML1	SCML1		GARNL4	TRIM48	C1orf69	FXYD1
ITGB3	B3GNT1	C17orf39	MARCH10	TIGD5	TIGD5		NPAS4	GALNT11	MON2	HMG20B
LOC653319	PAPPA	COL6A3	PAX9	EHD2	EHD2		C1orf222	CAMK1D	BBS7	WBP1
MDFI	DCUN1D2	ZSWIM2	LAYN	STRN4	STRN4		CPNE7	KIAA1530	DDEF2	RIN3
ANKRD46	PQLC2	VIP	CTNNA2	CALM3	CALM3		C1QTNF4	ENPP6	PGR	LYPD3
CCDC100	POLQ	PDAP1	PDS5B	ERCC2	ERCC2		OXER1	PRPF18	LACE1	IRX3
ARHGAP20	SCD	GALNT3	NPAL3	PCDHA6	PCDHA6		SNX30	FEV	UBE2L6	SDCCAG8
GGA2	C15orf39	CTNNA1	PAQR4	RGS1	RGS1		GPR114	WASL	SRFBP1	ALDH6A1
CCNY	SFT2D3	MAPK1	KBTBD6	ZNF512B	ZNF512B		TULP1	SLC34A2	AGPAT5	TSPYL2
PUNC	LINGO1	TNPO1	TRIM14	NUDT11	NUDT11		ODZ2	TPCN2	PDLIM4	LOC554235
ASH1L	DLGAP4	NR3C1	DNAJB13	CDKL2	CDKL2		PIP5K1C	WNT7B	C5orf33	GLIS1
NCOA1	ATP8B4	TNFSF11	VDR	AKAP10	AKAP10		FXYD2	FLJ40298	ABCC12	C17orf59
LOC493869	KLHL6	MOSC2	ULK2	WDR18	WDR18		ZMYND10	LRRC1	CH25H	ANAPC2
USP38	RBM38	FAM135A	AARS2	KBTBD8	KBTBD8		ELFN2	POLR3G	hCG_1985469	IER3
C14orf28	NEK3	LARP4	SLC4A5	TTC23	TTC23		C8orf73	DZIP3	MXI1	TMEM102
SEC31B	STAG3	MINA	ICAM1	RPP30	RPP30		FAM100B	ABCC5	UTP15	ASCC1
GLRX	DGAT2	NFAT5	C15orf26	COL5A3	COL5A3		DMRTB1	RALA	USP47	IL17C
SFRS2B	MMACHC	PCDHA9	SEC63	C15orf42	C15orf42		DECR2	CYB5D2	PHOX2B	TSPAN15
TMEM30A	MAP4K4	MPP7	FAM81A	ATG9A	ATG9A		ITGA3	C9orf167	APPL1	EMID1
RASL10B	NSL1	TADA1L	GNG12	PTEN	PTEN		PHF15	PHF19	PI15	TIMM44
SLC10A7	CRB2	LMAN1	SLC9A2	PSMD7	PSMD7		FAM131B	HACE1	CYP2C9	SNX20
ENSA	KCTD21	TAF9B	BAG2	HAND1	HAND1		IQCE	RAB3D	SPIN4	RAB17
RAB15	SCN11A	MEX3B	PIK3C2A	KIAA1432	KIAA1432		MYOZ3	BCL7A	PRKAB2	TRAPPC1
CEP135	BCL2L1	PAWR	SLC26A2	ARF5	ARF5		NEO1	PUS7L	SPSB4	C1orf86
SOX13	KIAA1274	C14orf43	KIAA0408	TNFRSF1A	TNFRSF1A		JMJD6	TMEM30A	UBASH3B	C22orf36
HSPB7	AKAP5	RNF8	FHL1	SHROOM2	SHROOM2		C6orf47	FAM43B	KBTBD6	NXPH4
JOSD1	CBX5	MTMR12	C11orf77	FBN1	FBN1		REPIN1	CDKN2D	POLR3F	WAS
TXNDC6	DVL3	HIGD2A	FBXW7	C1orf74	C1orf74		ABL2	CLEC7A	HNMT	LHB
SLC11A2	NRTN	ATXN7	KLHL14	TNFRSF9	TNFRSF9		STX18	DERL1	ZFHX3	TMC4
TIA1	CCDC76	DENND1A	POLDIP2	DAAM2	DAAM2		CAMKK2	ARHGAP27	FAM136A	ECEL1
RELL1	SYNC1	HOOK3	ZKSCAN5	C9orf165	C9orf165		ANKRD23	CASP2	NAP1L2	CYP21A2
KLK10	FKTN	SLMAP	RPL22	CLEC7A	CLEC7A		MGC33894	NDUFA5	HS3ST3A1	DOHH
ZNF697	LSM11	FNDC3B	ODZ3	DAZL	DAZL		APOLD1	ANAPC11	DNAJA2	ACTA1
TK2	SCN4B	NAALADL2	CD36	SIDT2	SIDT2		MAZ	FAM76B	SEC63	EWSR1
MGLL	ST7L	PARD6B	UBE2A	ROBO1	ROBO1		ZBTB5	TDRD6	METAP2	NTNG2
CLP1	IL22RA1	TP63	SLITRK1	TFAP2C	TFAP2C		KCNJ12	PAM	ATP11A	C1orf222
NKD1	GFOD1	CHCHD7	ACSL3	PALM	PALM		PAQR5	FGF4	PDE4B	C1QL1
DEFB119	XK	CNOT1	ITPR3	ELF2	ELF2		SH3GLB1	NRP2	TCEAL2	ASCL2
RBM35B	SSX5	PDZD11	SNCA	ZNF282	ZNF282		C17orf70	VSX1	TMEM19	C19orf50
CLASP2	SEMA4F	SNX1	ICOSLG	CEACAM6	CEACAM6		LOC196415	TAF2	C13orf18	PTDSS2
ELOVL4	DSG3	CEBPG	VEZF1	SMTNL2	SMTNL2		TMEM62	PLP1	E2F7	PSCA
HOXD1	PPIA	PCSK1	CEACAM7	UQCR	UQCR		SPOCK2	PARP16	NFIB	GBX2
KLHDC8A	PAX2	PPP1R3C	SLC2A11	ZFP36L1	ZFP36L1		SASH1	PNLDC1	NNT	C11orf2
GATM	DDX19A	PTGER3	CBLB	PCDHAC1	PCDHAC1		HISPPD2A	PLEKHA3	LHFPL3	TRIM31
IQCB1	RRM2	GHITM	SMAD1	UMPS	UMPS		PKD1	MYEOV	MED21	SOD3
PAFAH2	TBKBP1	BCL6B	CDC23	ATPAF1	ATPAF1		G6PC	TNFSF11	TMTC3	OTOS
CBX2	CDC34	ZMAT1	CEACAM5	ZBTB47	ZBTB47		DHX58	NLGN2	KIF4A	DPEP3
RHBDF2	ZNF202	ABLIM1	DSCAML1	ELOVL4	ELOVL4		CD300LG	ARHGEF7	USO1	LHFPL1
MGC13057	CLCA3	PAG1	TMEM143	CAV2	CAV2		STK40	ADO	DNAJB6	PTOV1
PMF1	OSMR	SLC39A14	C14orf142	C6orf142	C6orf142		PAK6	CCDC28A	TOX4	RTN2
MAGIX	LIPH	PPP1R9A	FLJ41603	SUFU	SUFU		TFCP2L1	PTDSS1	FZD6	COQ4
TPK1	GEMIN7	MBTPS2	P53AIP1	CSDA	CSDA		SH2B3	CLTB	RAD23B	C3orf56
ANKRD53	MAPK6	CPD	DDI1	FRAT2	FRAT2		SLC36A1	BMP7	ZBTB9	GMDS
BTF3L4	PPP1R15B	PSG5	CSMD2	SLC16A7	SLC16A7		USH1C	MYT1	C1orf71	MYL9
SIX2	NLRC3	EVI5	TMEM188	C11orf31	C11orf31		RFTN1	SLC30A3	PHF16	WFIKKN1
SSH1	CCL7	PSG11	C12orf65	FCRLA	FCRLA		ARHGEF3	USP30	IL1R1	YPEL3
ISG20L1	ATG10	MTMR6	KHK	HRH1	HRH1		KRT32	AHNAK	ZNF202	LRRC61
ACSS2	LRIG3	PSPC1	UBR1	C17orf81	C17orf81		ENTHD1	ASB16	SOCS5	AARS
SERPING1	HSPC105	ARFGEF2	RGS1	ERCC6	ERCC6		GATA6	CLDN16	GTF2E1	TRIM46
CTHRC1	FRMD4B	ZNF558	SORBS1	SETDB1	SETDB1		DNAJA3	SYTL4	EIF1	OGFOD2
DCT	FRAS1	GAPVD1	ATP2B1	TPK1	TPK1		ATAD4	PEX14	ABCG5	C1D
LOC643641	IGF2BP2	ATP6V1C2	AMOTL2	HAS3	HAS3		PSMD1	ZNF528	ADORA2A	LRFN2
CD6	TMPRSS2	C1orf52	GAN	ZNF167	ZNF167		CTNS	ZFP90	TMEM87A	GPBAR1
MC2R	ZNF10	CDKN2AIP	LAPTM5	CDC42	CDC42		BCL2L2	RABL5	TDRD10	NDUFA4L2
EPB41L4A	CPA4	BUB3	ARMCX2	KIAA1211	KIAA1211		RAG2	C20orf200	LOC91461
ECM2	COL3A1	TBC1D1	AMBP	FERMT2	FERMT2		ASCC2	C10orf6	MTUS1
WFDC12	CDV3	AK3	RRAS2	KIAA1199	KIAA1199		C15orf17	DAPK1	STX12
TMEM135	ZNF583	ZNF767	ZXDC	CCNT2	CCNT2		PPIL6	RUVBL1	BCL10
MASP1	WDR37	TCERG1	SNF1LK2	IFFO	IFFO		TMEM65	MAP7D2	MAK
TBX5	BEGAIN	SLC7A1	SCAMP3	PURA	PURA		PDE4C	THSD7B	FSTL5
CLDN1	PTAFR	RNF125	DBC1	MYBL2	MYBL2		FAM107A	C20orf12	CAST
ZBTB24	MTERFD2	TFRC	POLR3G	COL7A1	COL7A1		LSM14B	ATP5G1	STAM
USP24	GAN	RNF13	FAM13C1	C9orf7	C9orf7		HCN4	CUL2	SMAD1
TP63	GAB3	RAD21	NDP	C14orf138	C14orf138		C14orf94	ACPP	HFE
RALB	ZNF280B	UBE2W	RALA	CLDN1	CLDN1		GPR56	TFAP2E	CXorf1
SVEP1	GNPTAB	PER3	LMO2	LAMC1	LAMC1		BDNF	TRIOBP	KLF11
NME6	PPAPDC1B	AGPAT5	RAPGEF3	DGKH	DGKH		SCG3	SLC5A6	PDCL
TMEM10	SIGLEC5	CIT	LOC493869	CCNF	CCNF		DUSP8	TANC1	DCN
DAPK1	C1orf91	PSG3	FAM152A	BCCIP	BCCIP		C19orf10	JMJD1B	ELL
SGSM1	HAND1	PCDH11X	RASA1	MYOD1	MYOD1		WDR45	LIN28	ZNF461
ANAPC13	CLDN12	OSBPL8	MID1IP1	PURG	PURG		GNMT	IGFBP4	LEFTY2
SERPINB9	FLJ36031	ARHGEF12	BRMS1L	FAM101B	FAM101B		ACPL2	USP7	C3orf64
OTUB2	EDN1	TNKS	RASSF6	SLC37A1	SLC37A1		ADAMTS18	CAP1	HIVEP1
SCUBE3	BTN2A1	PCDH11Y	LOC401052	VEGFA	VEGFA		POLR3K	PERLD1	DPYD
VPS26B	ADAMTS8	NPAT	BET1L	PDIK1L	PDIK1L		WBSCR18	KBTBD2	CAMTA1
MBTPS2	LOC493869	AASS	SNX6	FEM1B	FEM1B		RS1	PLS1	ACBD4
SPRYD4	OLFM4	PRSS16	VNN1	MTMR4	MTMR4		FERMT3	DUSP10	ZFX
ACPP	C17orf56	SLAIN2	MYST3	TGDS	TGDS		CTA-126B4.3	PDLIM4	FXC1
NR1I2	POLR2D	PGAP1	SIAH1	PCDHA5	PCDHA5		PHF7	SLC37A3	DDI1
RFESD	BRF2	STXBP4	MRFAP1L1	DDEF2	DDEF2		SPATA19	CNPY4	H2AFV
GNRHR	PRTG	DDX52	TSHZ3	COL22A1	COL22A1		SLC2A1	LRRC56	CRTC3
HTR1E	DOT1L	CDKN1B	RWDD2A	RIT1	RIT1		CC2D1A	SLC13A1	PIGA
NPAS3	ZNF200	API5	REEP1	RFXAP	RFXAP		C10orf25	TMEM166	EPHB1
MLXIP	IFT80	AP3S2	ZXDA	POLDIP3	POLDIP3		OPN5	TOB2	PTGS2
C19orf47	GCNT4	VBP1	KIF23	ZNF324B	ZNF324B		GCK	HSD17B6	PMP2
ISLR	PCDH21	C8orf59	BAALC	FAM73B	FAM73B		UBE2Z	REEP4	PDP2
PGRMC1	DMD	FLJ11151	TRIM59	DCUN1D4	DCUN1D4		EPHB2	PCGF2	MMD
CYP2U1	CD80	TGFBR2	CXCL3	OXNAD1	OXNAD1		FAM26B	GPR116	UNC84A
HOXB4	ACSL6	NSL1	SLC16A14	PCDHA3	PCDHA3		MGMT	TMEM132D	SRP9
LASP1	XG	ELAVL2	AQP6	LPL	LPL		PACSIN1	GNE	BTN2A2
ZNF362	EFHD2	GREM1	NAB1	SFRS2IP	SFRS2IP		OAS3	TEGT	BBOX1
SEPN1	SLC12A9	C17orf51	NAMPT	C2orf63	C2orf63		TNFRSF1B	POU2AF1	DEGS1
RTTN	CDKN1A	YOD1	HEXIM1	KCTD5	KCTD5		OVOL1	PIGX	GAGE1
NOVA1	ATPAF1	DDX3X	PRR3	PCDHA10	PCDHA10		AOC3	NXF1	BIRC5
RBM12B	COL5A2	SMC6	C11orf45	PCDHAC2	PCDHAC2		PCSK6	GLIS2	HMGCS1
TMEM110	LRIG2	ATP6AP2	INHBB	SEC23A	SEC23A		ANK1	LRRC57	NDUFA4
MAPK11	THAP9	DCUN1D1	EMCN	ULBP2	ULBP2		RAMP3	JPH1	VASH2
C2orf63	NOPE	PF4V1	GIT2	C20orf4	C20orf4		SMO	RNF182	WDR37
TXLNA	ZNF792	NPAL3	ZNF239	PXDN	PXDN		RBM8A	ARF3	DLG5
TK1	STX3	CALB1	PURA	ADAMTS6	ADAMTS6		PREX1	PCDHB10	FIGF
KCTD14	UHRF2	TRDMT1	MTSS1	HN1L	HN1L		PTAFR	ANKLE2	MTMR2
SLC25A32	ERCC6	CLMN	CAPRIN1	ELN	ELN		FAM82B	FBXW11	IL2RB
ASNA1	MST150	GPR155	FEZ2	DNMT3B	DNMT3B		MPP2	NTHL1	SRP54
ZNF410	PLCB2	ATP11B	FUT8	TRIM31	TRIM31		ZNF512B	COL17A1	ZNF512B
GPR114	HDHD1A	PAK7	SMARCD1	COL15A1	COL15A1		SLC38A2	MCM6	SNX9
ZNF311	BSDC1	MTF2	MXRA5	NUP160	NUP160		EN2	GNAT1	SLC38A2
UTP15	ZNF763	MAP3K9	VAMP2	DUS2L	DUS2L		ACTR1B	RPL13	CDKL2
KLK2	CD200R1	AICDA	PDZD11	WDR40B	WDR40B		GDAP1L1	MAP2K7	HADH
TPP1	LBR	PDXDC1	CLEC14A	REXO4	REXO4		SLC26A1	CRYBA4	SH3GL2
ACVR1B	ANKRD28	C12orf56	ZNF706	NPM3	NPM3		RBM14	SNAI3	CFTR
CHD3	UFM1	FKBP1A	VPS26B	PCDHA2	PCDHA2		EIF4EBP1	SLC41A3	C6orf151
ZNF498	ADRB3	PBX3	RNF34	SIRT1	SIRT1		GRHL3	CENPJ	CHD1
BZW2	SLC25A18	C16orf75	TMEM22	DGAT1	DGAT1		CD1E	TPBG	GPT2
APC2	PXT1	PBRM1	CYB5A	ZNF498	ZNF498		CALU	ZNF238	MYCT1
YKT6	PLEKHG6	WNT16	STAT1	ISLR2	ISLR2		GGA1	COBL	PSG2
IL12RB2	CYP4F2	NPTXR	ARPC5L	FEM1A	FEM1A		TMC8	WDR82	FLJ32549
DLST	MAP4K3	NUFIP1	SMAP1	SFTPH	SFTPH		MON1B	MYOZ3	RPP30
RRP1B	HDLBP	CAND1	GPR34	SCAMP5	SCAMP5		CCDC69	ST6GALNAC6	MAGEE1
HNRPUL1	AIFM1	GOT2	ZNF500	FLJ10404	FLJ10404		TMCC2	AKAP1	C16orf72
MAP2K7	GYG2	TEX2	VTCN1	LRCH1	LRCH1		TAT	CCNJ	GLDN
GLUL	PEX11B	PABPC4L	KBTBD4	AIFM2	AIFM2		WASF2	MCHR1	SOX30
ZNF547	SEMA4C	SLC26A9	CYP4V2	HNRPUL1	HNRPUL1		LMOD1	KIAA1975	WASL
KIAA1467	GALNT1	GOLGA7	SP3	RAB30	RAB30		RPUSD1	MAFK	MAGEB4
C3orf52	C1orf200	PDE3B	ZNF594	LYSMD1	LYSMD1		LAD1	CTDP1	KLRC4
SLC25A40	C8orf58	GTPBP3	AIM1	DVL3	DVL3		C1orf91	ZC3H10	CXCL5
IRF5	LIN28	PTPDC1	GZF1	GSR	GSR		ITGA5	NAV3	FAM116A
C1orf26	PARS2	MTL5	SEPT6	RAPGEFL1	RAPGEFL1		NCOR2	PHTF2	C18orf17
ULK2	ADRB2	KIAA0408	LETMD1	FAM136A	FAM136A		C1orf144	NAPB	UBE2J1
PDE12	ADRB1	B4GALT6	KLRD1	COL21A1	COL21A1		WDR92	CDH13	P4HA1
ALDOC	SLAMF6	BANK1	STAT2	C17orf68	C17orf68		RALA	WDR41	RNASEH2B
C16orf75	TTC14	VCAN	VPS39	MEGF6	MEGF6		C4orf19	ZCCHC10	SLC12A2
ABCC10	PRPF38B	ERMAP	KPNA3	FAM130A1	FAM130A1		RELL2	MRAS	PPM1B
CHD4	COL1A2	KCNG3	SNX24	COL4A3	COL4A3		PHLDB1	CSGALNACT1	MAP4K2
ARRDC4	FASLG	SFRS1	DDAH1	HBEGF	HBEGF		UGCGL1	CLIP2	COX7C
HBEGF	TNFSF9	B3GNT5	UTP15	NAV3	NAV3		TERT	TATDN2	ZNF460
DCLRE1B	POLR3A	PIH1D2	CD83	SLC6A14	SLC6A14		CD4	C3orf39	CAPS2
TUBB4	THRSP	EIF4A2	STX7	HINT3	HINT3		HCK	C1orf213	DAGLA
VSIG4	RASGRP1	PRPF4B	HEY2	WDR41	WDR41		H1FOO	JUB	CCDC100
BCL7B	FBXL12	E2F7	TBC1D12	C10orf26	C10orf26		ASH1L	POR	LGR4
EIF4G2	AHCTF1	KLF6	TBC1D10A	DPYSL2	DPYSL2		PILRA	TNFSF10	C11orf30
E2F5	MRS2	MRPL13	NEFH	NAP1L3	NAP1L3		KCNJ9	ACAD11	ARHGAP20
SLCO2A1	ZNF689	KIAA1128	ZNF365	COL5A1	COL5A1		STEAP3	AK5	SLC30A10
LASS2	ZNF343	C2orf60	C13orf31	COMMD2	COMMD2		ABCC1	FLJ20489	TBC1D4
GHRHR	NHLRC3	EHF	NXF1	ZBTB5	ZBTB5		ANXA11	PPIA	USP36
RNF7	TSPYL5	RNF38	IFIH1	TPM1	TPM1		GMPPB	HS6ST2	C10orf118
ZBTB5	FGF11	WASF1	TUBA1B	MPEG1	MPEG1		MARK4	TRPC1	ANXA11
FLJ39743	PLA2G3	IPPK	LELP1	KIF26A	KIF26A		MYL7	RNF38	SFRS2
RDH10	IL13	C2orf29	GLIPR1	SGK1	SGK1		CRY2	SMCR7	GCC2
SLC25A27	TBC1D12	ARHGEF3	TSPAN7	FLJ13137	FLJ13137		ADAMTSL1	TMEM57	GUF1
TMEM138	NAP1L1	ENOX2	C5orf34	C4orf32	C4orf32		BRSK2	METTL9	DUOX2
CBFA2T3	HMGA2	RAB11A	TCP11L2	TIMM8B	TIMM8B		THNSL1	KIAA1328	SCD5
RGS16	CDH1	IL1R1	HAPLN1	NAV2	NAV2		TNFRSF10C	PRDM9	TNFRSF8
ATP2B3	CTPS2	ZNF540	CAB39	HSPA5	HSPA5		AP1M1	EBF2	CHSY3
GALNTL2	IGF2BP3	NTS	ZXDB	SFPQ	SFPQ		CYFIP2	BTBD8	PYCRL
PI4K2B	SLC10A2	MRPS27	AP1GBP1	C8orf13	C8orf13		BRUNOL4	NGRN	DPT
TTLL6	ARG2	PCDHB3	WRB	RNASEL	RNASEL		PPP1R12C	RNF146	PRTG
NNT	RDX	C9orf71	LRRC19	AGTRL1	AGTRL1		C19orf61	GSTM5	LMOD3
NOL12	GNAT1	CDC2	RIBC1	NEDD9	NEDD9		MED1	AURKC	SLC10A7
NARG1	CASP3	GTF2E1	GALNTL4	MAPRE1	MAPRE1		CAMKK1	C14orf2	ENSA
AHCYL2	SMUG1	ST6GALNAC5	PCTK2	GALNT2	GALNT2		C14orf122	KRT32	EFNB2
EHF	ABT1	HS3ST2	LOC116349	ITPKB	ITPKB		TEX264	Dec-01	ILDR1
STK40	DTX2	TMEM40	MPP5	ARHGEF10	ARHGEF10		LIMS2	ATP10A	PLA2G12B
ABHD14B	DPP3	CCDC126	SLC24A3	PPIA	PPIA		PIK3R5	C14orf102	MSL3L1
CYP46A1	DCUN1D3	SPG21	USP49	OXTR	OXTR		BET1L	LY6K	PPWD1
MYO1H	FAS	DOCK10	LYPD6	TM4SF20	TM4SF20		SOX13	PCDHB3	NADK
RASSF4	NPHP3	LHX6	PSIP1	FLJ31818	FLJ31818		REEP2	DYM	CHN1
CACNG4	POLL	EXOC2	PSD2	SLC5A8	SLC5A8		SLC25A35	NSMAF	NFE2L1
COLQ	PTPN7	IL1RAP	PEX13	FBXW7	FBXW7		KIAA0895	PPIC	IL12B
SRGAP2	ZCCHC9	STK32C	TSPAN6	USP2	USP2		PCMTD1	DLL1	TXNDC6
ABHD9	CCR7	ARIH1	MAPK4	LEP	LEP		BCAP29	CCDC92	STCH
CCL25	RANBP2	STX12	GPR17	GPR161	GPR161		SLC29A2	ACYP1	F8
SNX5	TMEM144	HSF2	C13orf18	COL4A6	COL4A6		CPXM2	NOL14	DERL1
LSM6	PDE12	CCDC14	CDH11	FAM57B	FAM57B		SLC11A2	PTPN12	CRIPT
LY6K	FMO4	SLITRK2	RCN2	MRPL17	MRPL17		WDR59	PRLHR	EIF2C4
TBX10	CCNJ	ZBTB4	NOL12	SLC26A6	SLC26A6		LETM1	GABRA6	CD2AP
LDHAL6B	CMTM6	ATG10	OXTR	CXCL10	CXCL10		ARHGAP27	GUCY2C	DSC2
RPUSD3	LRIG1	FAM43A	TIGD7	LOC400506	LOC400506		APOBEC3F	FOS	CASP2
VPS8	MAP3K1	PRDM1	C1orf162	SERPINH1	SERPINH1		MAGEA8	C6orf130	TMEM200B
LLGL2	ATG4B	C1orf27	CCKBR	CD79B	CD79B		ATG4A	VASN	ZNF654
FOS	EIF2S2	PJA2	GABRA5	NEUROG3	NEUROG3		SPNS2	KIAA2026	SASH3
AGXT2L1	CMBL	C12orf12	NECAB2	CPT2	CPT2		LEMD1	AIG1	ARL11
CPXCR1	C9orf40	C3orf35	E2F4	KIFC2	KIFC2		PPP2R4	AGTPBP1	ELF2
TRAF6	DARS2	CDC14A	ATP10A	P2RX5	P2RX5		TMEM37	DACH2	EIF2S3
SUGT1	CEP110	GLS	CSTB	DBC1	DBC1		FGD1	FBXO4	HMP19
SP140	FNIP1	CCDC125	LSM6	RP9	RP9		TMEM105	LAT	ST6GAL1
C10orf95	PLXND1	CPNE4	C1orf94	GH2	GH2		HMP19	FASTKD1	ADAM12
KRT2	DAPK2	FOS	RAG2	MS4A6A	MS4A6A		MMP24	TOP1MT	ABL1
PECI	ZSWIM5	MRPS18B	KIFAP3	MAP2K6	MAP2K6		SLC37A2	WDR66	MRPL42
SAMD3	MED28	CACNB2	WDR88	XPNPEP1	XPNPEP1		UBE2R2	C2orf50	ZNF664
PCDHB6	DKFZp564N2472	UBXD3	TSPAN5	CCDC28B	CCDC28B		PDAP1	YWHAH	RBM4B
GZMB	WARS2	IFT74	GTF3C1	SPNS1	SPNS1		CHD2	HOXA5	CTR9
PLEKHJ1	TNFSF10	ZNF436	RNF133	A4GALT	A4GALT		ARHGAP30	DTX3	TICAM2
NCSTN	COIL	ERO1L	CYorf15A	PCDH15	PCDH15		MAGEA11	EIF2B2	EXOC8
NEDD8	APBB3	CLDN18	FAM5C	MBD5	MBD5		C19orf36	PIWIL4	CAV2
ATP6V1D	C19orf54	TMEM108	DUSP21	WNT8B	WNT8B		PLEKHM1	CCL4	GALNT7
HERC5	NDST2	DNAJB1	MAGEL2	BOC	BOC		ESRRA	USF2	RFXDC2
DDOST	FAM118A	ST6GALNAC3	PWP1	RPS6KA1	RPS6KA1		ROGDI	GRRP1	COL6A6
CHCHD3	TMEM2	FASTKD1	FBXO4	PYCR1	PYCR1		FKSG24	EED	SLC35F5
C8orf42	COL4A6	ZNF280D	IGSF21	CAPN13	CAPN13		ARHGDIB	AVEN	NCF2
TIMM8A	SLC35D2	ZNF345	DOCK2	CCDC146	CCDC146		CCBP2	PNMA6A	FAM135A
RNASE7	C14orf2	ZNF566	FKBP10	ZNF44	ZNF44		WNT4	C21orf33	TACC2
ATF7IP	ENTHD1	DDO	C2orf50	SH3GLB2	SH3GLB2		C3orf15	CSK	CAND2
SLC25A38	MAGEA1	CYR61	FAM9C	C20orf67	C20orf67		ATXN2L	HPS6	NAB1
TOPBP1	MED6	C10orf67	COL29A1	EPC1	EPC1		NINJ1	MIZF	CNNM3
CCDC17	DIABLO	PCDHA6	SLC20A1	C6orf218	C6orf218		C10orf83	RDH16	GPR84
URG4	GLB1	HPS4	MRPS6	KIF12	KIF12		C9orf58	TEPP	CYP24A1
CHAC2	HMGCL	MFSD8	EED	TEAD2	TEAD2		UROC1	ZNF358	NAMPT
ZNF474	ISY1	TUSC3	PIGU	TFAP2E	TFAP2E		CSF3	HYLS1	G3BP2
C1orf175	GABRA6	PRDX3	HPS6	MFSD2	MFSD2		SYT12	MYOG	USP32
STK19	KCNAB3	CD48	FAM148B	UBE2L6	UBE2L6		ISG20L1	MAN2A1	NHLH2
NDUFA6	ORM1	CAPZA2	SPPL2A	LOC652968	LOC652968		RPS6KA1	UGT1A6	ZNF652
IHPK2	NLN	ZRANB2	TMEM16D	TOMM7	TOMM7		SLC25A34	COMMD10	LRRC3
STAMBP	IL1F9	IL2RB	SLC26A3	CMYA5	CMYA5		PYCR1	PSG4	MGC13057
MAGEA8	LRFN4	PEBP1	LHX8	EPSTI1	EPSTI1		MEX3B	COL13A1	CACNA2D4
LACTB	DET1	ATP1B1	CSF2	NTNG2	NTNG2		SNAP23	ANXA7	CADM1
AMAC1	LCE2B	ZFYVE16	USF1	SPACA4	SPACA4		TM2D2	ST6GALNAC4	ELF1
COL6A3	TRIM15	AKAP6	LRRC31	BTBD6	BTBD6		C1orf19	DNAH8	CFHR5
IL12A	ATXN7L2	RANBP5	INSL3	NID2	NID2		RIMBP2	ATP5L	RBM39
ALPL	GPX7	EN2	ADAMTSL4	LOC283551	LOC283551		TRPM2	KIFC2	C9orf150
SEPHS2	SPON2	ATP2B1	TRIM3	RHBDD3	RHBDD3		KIF6	C20orf24	C21orf63
WHSC1L1	MPHOSPH6	C14orf135	SAAL1	C1orf78	C1orf78		ORAOV1	EVPL	ZNF678
PCNA	ZNF57	C6orf151	C21orf55	RFXDC1	RFXDC1		DENND1A	PKP4	TAF9B
PHKG2	ZNF823	PCDHB6	DOK5	AP1S1	AP1S1		EBF4	PROC	PDCD6
EDC4	SLC25A4	TTC23	CXorf15	LOC51057	LOC51057		PATL1	CCDC55	RABGAP1L
WDR6	SLC37A4	GLDN	SSX1	CCNE1	CCNE1		FAM109B	C17orf59	UFM1
TMEM199	SLC38A9	DYNC1LI2	NDUFA3	CXorf26	CXorf26		SEMA3G	JUNB	ZNF639
KIAA0391	LRRC41	PHF20L1	MAD1L1	EN1	EN1		YWHAZ	ARL4D	CCNT2
HEPH	THYN1	GPR180	C12orf31	SCHIP1	SCHIP1		USP24	LYSMD2	ZCCHC8
TNFSF13B	DUSP1	DIS3L	ECE2	RFNG	RFNG		TP63	TBX21	PAN3
HIST1H4D	EVI2B	IL18R1	ZDHHC16	DYNLT1	DYNLT1		IQGAP3	RNMTL1	CLOCK
RAB40B	CEBPD	NCAPG	C6orf146	KIF4A	KIF4A		TMEM16J	ATF7IP	UPF2
SLC16A10	ZCCHC11	WASL	LSM4				NAT9	COCH	TSPYL4
DNAJB11	GPATCH3	DNAH8	CLDN7				GPIHBP1	TMEM106C	KIAA1598
SUPT6H	CCDC81	C3orf14	ARHGAP15				MVK	TMEM128	TOM1L1
B3GNT1	TUFM	ZSWIM1	COPS2				CLDN6	KRT36	CPLX3
POSTN	CTSF	TCTN3	POLR3E				JMJD3	PLCG2	RB1CC1
RIT2	STAB2	MERTK	SIRT4				RASGRP2	TMEM198	SPRR2G
SIGLEC6	S100A8	SCOC	SNX7				SMG6	CCDC5	TMEM135
PIAS4	IQCG	SLC19A2	ZNF30				MLLT1	ADM	UBP1
EPS8L3	JMJD1A	CUBN	CASC5				ANPEP	WDR59	SEPT9
SERPIND1	POLR3D	ARHGAP12	DQX1				SEMA6C	TAP1	PLEKHH1
ZNF193	C11orf51	EPS8	SKIL				VPS41	EVC2	HOXA10
GPR137B	DPAGT1	C13orf23	C6				DFFB	BRP44	TAOK3
MED24	NAT6	DMRT3	CYP4F12				KIAA0100	RGS10	TRPM6
NOL3	HSD17B11	POLR3G	FDX1L				SRRM2	ASCC1	P4HA2
CA7	EPS15L1	RECQL	RHOXF1				H2AFJ	COL6A3	PAK1
CTSL1	PLEKHO1	TMEM86A	GIMAP1				SIAE	RNF103	GTF3C4
KRBA1	PLCD4	SEMA3C	TRIM17				SLA2	GSPT2	CD5L
KCNH4	LECT2	C5orf5	GRPEL1				TTYH3	CRYGD	TOR1AIP1
FUS	ANKRA2	KIAA0090	C19orf36				SMYD5	FGD1	LIMD2
TDO2	HIST1H2BK	TNFAIP6	ZBTB26				ZNF704	PRDM13	SGTA
IL15	DALRD3	CCL22	DPM2				SNRK	AKR1CL2	HDGF
NID2	PITRM1	C11orf30	TMEM49				NIBP	ID2	PREPL
CORO7	IL6	C9orf167	AIFM3				LCA5	ALMS1	DSG2
PGM3	SLC16A10	PCAF	SGCA				SLC5A5	ZNF428	TMEM1
RNF17	EGLN2	KPNB1	SPINK7				CADM4	PRPSAP2	RTF1
LALBA	CREB3L4	LOC493869	NCKIPSD				SHKBP1	STRA13	TMEM10
B4GALT4	VCAM1	C15orf29	MRPL50				MGC45438	CXCL3	RAB5B
LOC283551	ZFP2	RNF14	MRPS18A				SPRYD3	WHSC1L1	PCSK1
CLEC12A	RETNLB	CRY2	IRAK1BP1				MBD3	MARK3	PLEKHB2
S100P	COL4A2	ATP8B1	NAT14				MECR	ZNF750	GPR85
AHSA2	OSTF1	C15orf48	RABGAP1L				ZC3H7B	PSMD4	ZNF207
MLKL	ACTA1	TFPI	ZCCHC8				TGFB3	DRG2	SERPINB9
TCEAL8	PDCD11	SLC25A38	KIAA1797				PSTPIP1	ARHGDIB	ZNF321
RAB25	CLGN	SLC10A7	KCNS3				ISLR	IQCB1	RAD51
RAMP1	PPARGC1B	PARP2	UFD1L				ZFR2	MYOM1	PLEKHG1
HVCN1	ITGB7	WDFY3	BAI3				PERLD1	TMEM187	CBS
RABL4	SPATA7	LOC440087	ESF1				C13orf30	HCCA2	ATP8B2
ADRA1B	PCDH12	FLJ42957	PAX4				STC2	CYFIP1	MAX
FARP2	TMED4	KIF5A	C20orf67				ZNF259	NSUN2	MGA
DDHD1	ERCC8	PLAC8	IL5				RSBN1L	DOC2A	TUBGCP3
IL11RA	CD74	CEP135	FMO3				KLHDC3	ID1	CD46
C12orf56	CENPK	SLC35C2	GOLGA2L1				SYVN1	ZNF18	TIAM1
XAB1	NPEPL1	GSTCD	ANKRD32				FLJ21865	SLC1A5	ABI1
LCK	NID2	DAK	COP1				SCN4A	ZNF446	GALNT1
FMO1	NEFM	STCH	RPL3				MLXIPL	MTG1	VCAM1
ARHGAP22	NARS2	MUC7	PURG				MUC1	HSD11B1L	UBQLN1
SMOX	TBCD	SLC11A1	SELK				PPFIA1	KLKB1	PHF8
TCEAL7	MMP1	KLHL5	ADORA3				GEMIN8	C1orf101	CTBS
APOBEC1	SUSD2	RUFY2	SIRPD				AHSA1	TTC32	ARCN1
MRPL47	UCRC	TIA1	CCDC95				CCDC32	SPRR2G	EDG3
LOXL3	HYPK	ARL11	UGT2B4				SOBP	ASZ1	YEATS2
CD300C	MPP4	ZNF697	CASP9				ARL4C	GSTA4	MLXIP
LOC144097	MESDC1	EIF2S3	ENOSF1				FBXO10	PRPF40B	C11orf61
FTSJ1	PTS	PCDH15	TARSL2				PRRT3	CARD14	C6orf97
SELP	WNT2B	FAM26D	KLRC3				FAM119B	TTC12	B3GALT2
UBAP2	FLJ20323	PPP1R2	ALOX12				AQP1	ANKRD32	ZBBX
TTC9C	HTRA4	PRUNE2	SLCO1B3				MAN1A2	C18orf51	ZCCHC2
UPK1A	GOLGA4	RNF141	C7orf10				PALLD	SCG2	RAB5A
CEP76	IDH2	CLCN6	SLC2A8				EFCAB1	KLHDC4	FHDC1
DUSP11	ISCA2	PCDHAC1	NMU				KIAA0317	GAA	SERPINE1
LRRC16B	KIF2A	FBXO33	ERP29				CCT5	BRD9	OR7A5
RHOJ	GMPR2	CHD2	TRAP1				LRRC56	STRA6	USP6
CHRNA9	SEC14L1	NPTN	ARMETL1				C16orf57	COL14A1	GRINA
CCKBR	SRGN	REEP1	SH3YL1				PNPLA5	SF3B3	DCP1B
	LEFTY1	CCDC42	IL32				RPUSD4	P2RX4	TSHR
	GDPD1	TWISTNB	SYTL3				UBE2G2	RAB40B	GANC
	MMP11	ALDH9A1	HTRA2				GBX2	TEAD2	FGF14
	ORM2	FUT1	CNGA1				PSME3	LIPJ	TIMM17A
	YIPF1	WDR7	DPH5				TSPYL5	TXNDC14	SUSD1
	LOXL3	PABPC5	EML2				JMJD2B	DNAJB11	CRISPLD1
	ANKRD39	ZNF750	GPR160				PIAS3	RRAGA	SWAP70
	USP21	UBE2CBP	CCDC131				ABTB2	CYP4B1	CRKRS
	COL9A3	TMPRSS11D	LPXN				CSNK1G2	STK36	NOVA1
	TMEM66	RP2	STAP1				CYB5R3	ZC3H7A	TROVE2
	REC8	ARFIP1	ARG2				GADD45G	ATP5G2	RALYL
	FKBP3	AUTS2	DNAH10				ZNF365	SND1	TAPT1
	PRDM9	ATP11C	PPEF2				C9orf140	CYorf15B	CORO1C
		GATM	LOC51035				ZNRF1	AURKB	CYP26B1
		RSPO2	ETV7				POMT1	SERTAD3	LYSMD3
		NOL4	C6orf47				PTPRU	SIGLEC6	ARL6IP5
		ARHGEF7	KLF2				C7orf43	FRS3	MDFIC
		SMAD7	PRR5				APC2	C8orf47	GABRA1
		PLD1	FLJ21075				NTSR1	HECTD1	KCTD14
		PWP2	ZNF211				IL18BP	UBE2L6	CCND1
		SPSB1	SSX3				FZR1	GBA3	RFC3
		RFK	NUP54				COASY	FCRL3	LATS2
		ZADH1	C22orf28				KRT81	C1GALT1	PNOC
		TSG101	MAPK8IP1				KCNJ5	GPR34	SLC30A4
		LRRC8D	HRASLS5				FLT3	ME2	CCT5
		TOR1A	FKBP6				ADAMTS14	CHEK1	BHLHB2
		PANK3	SCHIP1				DLST	TMEM101	KIAA0265
		SIX2	CNDP1				SPSB4	JUND	MCF2L
		FANCM	LAMB4				MAP2K7	PLA2G4A	C9orf57
		SENP1	KIAA1833				COX4NB	MED24	TRIM55
		GP5	ITIH3				NEU4	C18orf37	C16orf57
		TXNDC10	IL23A				SLC9A1	AGBL2	KNCN
		RBM26	LRRC16B				PISD	HJURP	RFWD3
		KRTCAP2	GPR161				ADAM11	WFS1	ANKHD1
		ZNF544	OLFML2B				GALNT6	PEF1	SEMA3A
		PAN3					CECR6	C1orf77	RNF138
		CREB1					CTNNBIP1	MAP3K5	TMEFF2
		KCNK5					PSCD1	PTPRN	TBC1D2B
		MGC39900					PPARD	RPA2	SLC12A5
		DR1					RANBP3	TRPV4	ZNF160
		FPRL2					BRMS1	GBL	ANKRD50
		BAI3					TRIM39	NUPR1	GLT1D1
		CAPRIN1					TMEM151A	FLJ22374	ZBED4
		LHX3					MYO1D	IFNG	TMEM16F
		RNF6					C1orf183	ADCK4	ELMOD1
		LOC751071					FOXA2	IL13	NBN
		TRIM23					SLC6A3	CDCA3	PPL
		EDNRA					EMID2	MFSD1	RNF111
		CCR3					ST6GALNAC6	DUSP22	CHCHD8
		P4HA2					EXOC7	ZMYND10	ZNHIT3
		ZBTB33					RASSF1	ARID3A	ZNF257
		CYP4F2					TINF2	GEMIN5	PCDHB10
		RAB38					RPP14	C10orf35	FBXW11
		MRPS14					LSM11	DUOX1	WIPF1
		IL1A					C17orf58	ATP1B3	DNAJC10
		YTHDF2					BCAR1	CIRBP	CPT1A
		CABC1					LOC201725	ATP5J	STOML3
		DMGDH					SYNJ1	FASTKD5	ARG2
		LRP4					SPECC1L	TMEM120A	C8orf22
		EEF1E1					TIFA	DDX5	SCARB2
		MYH10					SLC16A1	PLA2G4F	PIGM
		SERPINB9					PRKD3	C17orf79	TNFRSF19
		KIAA0195					REEP6	CUL1	MLLT4
		MCM10					TRAK2	RASGEF1B	HHIP
		ASRGL1					NAPB	NAE1	IKBKAP
		MIA2					GMEB1	MESDC1	DYNC1I1
		FCAMR					PGAM5	RNF183	GLIPR1
		SEMA4C					ST7L	BLMH	RCAN2
		THSD7B					ATAD3C	NDUFA8	PNPLA7
		RAB40B					CDS2	RIC8A	COBL
		DOCK7					FLJ35767	WDR25	DCDC2
		FAM102A					CMBL	UGT8	NOL10
		SIAE					SLC22A12	RARS	KLHL18
		CCDC60					REM2	ADRA1B	KLK13
		TBC1D9					DES	IDH2	ZXDB
		C19orf42					GPATCH8	HERPUD1	C1orf26
		DHRS9					B3GALT1	PPID	PAK7
		RNF34					BATF2	LASS5	NUP62CL
		CYP7A1					PYGB	GSN	UBQLNL
		DSE					HAP1	C1GALT1C1	UBA6
		METAP1					OGFOD2	PSMA6	NPHS2
		NR1D2					POLR1D	NISCH	LRRC19
		LILRB3					EVC	C15orf33	FAM40B
		PCDHA5					WSCD2	CENPA	GDAP1
		IDH1					LIF	ASAHL	GBAS
		LCOR					PDE4B	LEFTY1	TSLP
		ZNF74					FAM134A	PHTF1	FHOD3
		C5orf13					MRVI1	DDX24	WDR35
		COL16A1					GPR61	C3orf32	INSC
		GTF2H1					CHAC1	RAD17	MYO7A
		PTPRE					CD2BP2	ANXA13	GPC2
		RPAP2					SNCB	IL18RAP	GRAMD1C
		WDR45L					MAPRE1	VRK1	ARHGAP11A
		RLBP1L1					KCNAB2	GNPAT	TLK2
		KIAA0241					RAF1	SLC17A2	NAV3
		MLL5					UNC45B	CMTM7	BRCC3
		FGF7					TSPAN18	ATAD3B	JUN
		NCR2					KLHDC7A	TAF7	NAPB
		TNFSF15					OXTR	C5orf25	RFX4
		GK					PSCD3	CMAS	ZFHX4
		FMNL2					LSM10	ADAM8	ETV3
		PLA2G4A					CDK3	ZNF571	SUV39H2
		GATA2					CA12	NPY	NEUROD4
		AIM1L					WDR5	ACTN1	RICH2
		MUL1					SLC39A3	B3GALT1	FOXL1
		PCDHA3					C8orf55	NFYC	TWSG1
		C2orf43					ATAD3A	CDH23	ABLIM3
		ZFR					LEP	CAPZB	FAM70A
		TXLNA					IL17D	FBXW5	TMEM16G
		SOBP					RAB31	UGT1A8	DNAJC5B
		CORO1C					C15orf37	EN1	C20orf103
		PCDHA10					BBS1	TMEM62	SP100
		RGS18					NLRC5	MED28	FER1L3
		C11orf56					COLQ	CHAC1	LIF
		EFHA2					SLC43A1	SNCB	CUL4A
		CYP26B1					PIK3C2B	CETN2	JAKMIP2
		LYSMD3					SLC35D2	HPRT1	MTDH
		C5orf29					HTRA3	NEUROD6	TXNL1
		TRIM44					EPHB3	DUSP11	CLEC4C
		HOXB5					ISG20L2	TNIP1	TRAF4
		HAND2					MB	GYG1	UNC45B
		KCTD10					SRA1	C11orf77	TRAPPC6B
		LRRFIP1					ING4	C19orf59	TNFSF10
		WHDC1					PIGS	CYP46A1	CSGALNACT2
		GABRA1					MAGEA1	GOT1	AP2B1
		ACSF3					OR6A2	FAM49B	HIST1H2AG
		TXK					TMEM51	BNIP3	KIF11
		WNT5B					VPS8	ZNF670	AK5
		FBXO5					IL17RE		UACA
		PCDHAC2					FCN1		ARHGEF10
		CNNM2					DUOXA2		NPNT
		ZNF667					GNRH1		TM4SF20
		KRT40					C6orf150		ZNF25
		DHX33					NXF3		SLC5A8
		LATS2					AGTPBP1		FYB
		TOX					PICK1		ZMIZ2
		ETF1					PRSS27		TLR8
		C9orf68					C6orf1		COPB1
		CBLL1					CLEC4F		IKBKB
		RGS22					CCDC61		CLEC4D
		TRIM35					ODF3		SOX9
		KCNE3					DNAJA1		SENP3
		ZNF277					PIGU		ANKRD6
		RPE65					ERCC2		DNHL1
		FPRL1					PNMA6A		BCKDHB
		CREBL2					CSK		TAC1
		VPS13B					IGFL1		LOC441150
		ZADH2					TMEM173		U2AF1L4
		C15orf56					CTXN1		MYC
		SLC12A5					BARHL1		C9orf95
		ANKRD50					CYP2A7		SERPINI2
		PKD2					ELAC2		PSEN2
		TPP1					RAGE		WDR65
		GRIK2					CABP1		TFB2M
		TBCD					LYG2		TCF7L2
		PIAS3					B4GALT7		CNTN5
		CLEC12A					CHRD		TMEM51
		NIPBL					PRR6		C8orf40
		SPTLC3					MDFI		ITPR3
		CREG2					UTP3		C7orf46
		ARID2					ARF5		HEATR1
		RBM27					VAMP5		SLC25A1
		HMGA2					BPIL1		PRKCD
		SLC38A4					MGC20983		PPAP2C
		WDR21A					GPRIN2		STARD3NL
		SHQ1					OLFML3		CYB5R2
		PCDHA2					LRRC41		LRRC4C
		SIRT1					IMPDH1		PLA2G7
		CD302					CDH3		LOC199800
		TSGA14					SELM		NRIP3
		GUCA1B					C15orf27		RAG1AP1
		SNAPC3					RNF215		CEP70
		NSF					LMBR1L		ZBTB37
		INADL					RHBDL2		DTX3
		CCDC75					AMAC1		RAB42
		ZNF419					GJB5		ZNF586
		COASY					CHST13		AMT
		KCNJ5					FBXW4		TACSTD2
		SF1					ANXA6		PGLYRP4
		FIBCD1					KRT33B		KRT1
		FBXL3					MYBPH		CALCB
		CENPI					RAB3A		SRP19
		PROCR					CYP2A13		TRIM15
		POLR3F					ECHDC3		MIPOL1
		HAPLN1					CLN3		OAT
		NCOA7					KCTD1		PTPRZ1
		ZNF649					ZNF511		SMC1B
		NEO1					WDR27		SOX3
		ZXDB					ABTB1		CARD9
		EXOSC2					GART		EFCAB6
		MTMR15					RIPPLY1		PCYT1A
		ZNF124					POLR2L		SPAM1
		PER2					TNFRSF12A		DOK5
		PMAIP1					GGT7		NSMCE1
		IRF5					SNAPC5		C9orf41
		RABL3					KIAA0391		LRRC34
		MEGF11					SORBS3		TSEN34
		GNA12					VMO1		NEIL3
		KLRF1					HPCA		KBTBD10
		BIRC6					TXN2		NUP133
		SYN2					GPR35		CLTA
		MLF1					LONP1		GFM2
		C14orf126					SCN1B		C8orf42
		RERE					STX5		CDC37L1
		TIFA					MRPL28		OLFML3
		HS3ST3A1					DPAGT1		C6orf146
		TNS3					YARS		TMEM106C
		ARL1					ZNF524		ADCK1
		NCAPH					C9orf142		TEX264
		EGFL6					PUF60		RHBDD2
		C3orf23					SPERT		TMEM31
		SLFN11					MYOD1		CHAC2
		HINT3					RPS6KB2		CCDC127
		CDH13					KLHDC4		PRPSAP1
		ZFHX4					HIRA		PSMA1
		SUMO3					C9orf16		MORF4L1
		CAMK2G					TRAF2		SETD6
		KPNA4					MARCH2		KCNJ8
		LMO1					C9orf75		AKR1CL2
		CXorf30					CCS		CCDC77
		MRPS23					ATP5D		DYDC1
		KCNH8					LOC790955		FGF17
		PDK4					PYGM		BMP2K
		GPR64					SPG7		CXCL3
		COX11					GNGT2		SMARCA5
		PIK3C2A					CHRNA10		BRUNOL5
		RGS13					ANGPTL4		PIK3R4
		FAM70A					HTR6		ROGDI
		B3GALT1					PRSS7		CEP78
		COL5A1					PIAS4		ZFYVE21
		STAT5A					LOC652968		KRT37
		GPBP1					DULLARD		PPBP
		CRADD					PLEKHH3		CLRN3
		SETX					CASP9		TCERG1L
		SNAP25					PES1		DNASE2
		FLJ11184					DUSP23		HNRNPR
		METAP2					DDB2		CYFIP1
		MUC13					HOPX		SRPX
		FLJ13137					FAM18B2		APEX2
		ESCO2					STARD10		APBB1
		EPHA4					EEFSEC		KIAA0391
		FRMD7					ATP1A4		CARTPT
		ARPC1B					TACR2		CARD10
		LYPD5					GBL		RBM26
		TMEM92					TMPRSS5		KRT3
		SCHIP1					C19orf50		BNIP1
		CSRP3					ZNF76		MSH5
		ZZZ3					SAPS2		PPFIA3
		PRKG1					STARD3		FBLN5
		LHFPL3					PSCA		ZNF223
		TRSPAP1					CD22		CIP29
		ZNF248					TRAP1		PPAPDC1A
		TRPC1					SLC1A7		SLC25A18
		PPP1R3D					GNG3		TALDO1
		CCT8L2					HYAL3		NMI
		FIGN					CYP2A6		C20orf67
		GNS					NUDT16L1		PDIA4
		DMXL2					WNT11		MRPS14
		ZNF364					RSF1		CABC1
		HPSE2					MATN4		MPO
		RNF146					LRSAM1		CCDC67
		TMEM206					ASB2		YY1AP1
		C14orf169					SLC17A1		CCDC99
		KIF2C					TSPAN1		RAB40B
		C16orf71					PTOV1		IL6
		EIF1					CYTL1		DEGS2
		MMP10					DUSP2		ACRC
		ARL6					SLC32A1		RBMS1
		CRH					SAMD11		SOD1
		CIDEA					DVL2		CREBL1
		TM2D3					PMM1		TXNDC14
		EIF2AK4					RILP		C11orf16
		ZNF598					GP9		ACAT1
		HTF9C					IDH2		TRAF3
		STK17B					RILPL2		CEP290
		MUT					COQ4		EIF3EIP
		MOCS2					TBX4		HTN1
		C1orf43					CHIT1		CYB5A
		CCAR1					PRR5		LUZP4
		ZNF675					ZNF564		BRD2
		FAM24A					TCAP		ZNF350
		MAGEB1					ADIG		TMEM27
		WDR66					MC1R		NPR3
		SEC24B					ASB3		C2
		SF4					VPS33A		STATH
		ABHD12B					C20orf96		SNW1
		CCRN4L					LMO1		SNAPIN
		C10orf116					C1orf122		PPA2
		SREBF2					BBX		CXCR4
		CER1					VPS37D		MLXIPL
		NPFFR2					HTR3C		KCTD13
		TWIST1					SETD2		C4orf29
		LCE2B					RABAC1		OLAH
		PRM1					ULK4		FHAD1
		PSG2					POLR2J		ACSM3
		CSNK2A2					PRDX5		FAT
		ZNF281					CD53		HPDL
		NDUFB1					CHST14		RPS14
		C1orf2					SPINT1		COLEC10
		ITLN1					NRBP1		TDO2
		NOS3					C1orf177		CENPK
		C20orf24					LOC340069		MYL6B
		CETN3					NARF		FLJ27505
		UBE2M					SIRT2		C4orf23
		C17orf59					GFOD2		MYH3
		STAC3					AHCY		PGBD2
		MCM3					C10orf82		MAGEE2
		FAM118B					PCBP4		C9orf86
		CYB5R4					DYSFIP1		ELA2A
		TTC5					RCOR2		ARMCX1
		DAXX							BPI
		PDHA2							IL13
		ASCC1							GEMIN5
		TAGLN3							SLC22A17
		TUFM							C1orf49
		PSORS1C1							FMO5
		C19orf28							OSR2
		PPA1							BAIAP2L1
		C11orf47							TRAM1L1
		LOC644096							ATXN2
		CSDA							PTPN4
		TACC2							KRT81
		PNLIPRP3							RRAGB
		ACTL6A							SMARCA1
		NCKIPSD							ZSCAN5
		SFRP5							CPB1
		GGT7							PRPF39
		IQWD1							SLC25A40
		MYL1							C1orf131
		HSPB3							C12orf52
		IMP3							INTS9
		CPA6							INVS
		PDCD6							NAT10
		SDF2L1							PRR5
		PCBP1							CD3G
		SH2D3C							KRT86
		OCA2							TMEM186
		UBE2F							C11orf48
		KIN							XAB1
		DGKH							RAD17
		C2orf42							C9orf61
		CARD14							TMEM98
		RASIP1							NCOA6
		NME6							PCOLCE2
		CCDC36							C5orf25
		DALRD3							CDCA2
		FBXO24							VPS33A
		RBBP7							E2F5
		CC2D2B							FGGY
		RRAGA							BSG
		TRADD							TIMD4
		LOC389073							BAG2
		MYO7B							DARS2
		DAD1							KCNRG
		TRIM61							SGOL1
		DYNLRB1							MDH1B
		MED10							IFNA21
		CCBL1							CAPZB
		CXCL1							TWIST2
		ICT1							GPAA1
		GAL3ST1							ZBED2
		SERPINI1							DONSON
		RAB20							DUSP27
		PSMD13							POLR2J
		ABCB11							FTSJ1
		SLN							UBAP2
		GPR137B							IRX5
		TTC30B							CD53
		NUBP1							TNP2
		LEAP2							HPRT1
		AGXT							NEUROD6
		COL1A2							HSD11B2
		C18orf37							TMED3
		NELL2							CDH11
		DKC1							KRT27
		CTH							T
		NPM1							TTLL6
		ZNF131							GYG1
		C6orf128							C11orf60
		CRHBP							APRT
		C6orf115							TMEM66
		FAM104B							LMAN2
		OMA1							MAD2L2
		ZNF133							KIR3DL1
		PROX1							GPR161
		WNT11							NCL
		TUBAL3							C19orf2
		SOD3							SLC35D2
		PGBD1							HTN3
		RTN1
		LRGUK
		RDH12
		RWDD2B
		CCDC112
		HHIP
		PRPF39
		IL13RA2
		LAMA3
		SLC25A40
		HERPUD1
		UBQLNL
		INVS
		C11orf53
		STK25
		GBF1
		NAP1L2
		DDX60
		SLC39A12
		HBD
		C22orf28
		CFL1
		C20orf103
		SLC25A21
		RNASE4
		ZNRF4
		PRDX5
		KLK5
		MTA1
		QDPR
		C20orf85
		SGK2
		SLC38A10
		C10orf30
		PAFAH1B2
		NCL

## Sheet: Table S2
Table S2. The potential gene targets for differentially expressed miRNAs in SLE patients versus healthy donnors memory B cells
hsa-mir-9	hsa-mir-629	hsa-mir-579	hsa-mir-335	hsa-mir-26a	hsa-mir-532
ANLN	API5	CDH6	AKT1	ACVR2A	ADIPOQ
APC	ARCN1	DICER1	AP2M1	AKT1	ANPEP
ARC	DICER1	GOLPH3	ARPC5L	ALPL	ARCN1
ATF6	SOAT1	HNRPD	BRCA1	BDNF	CDKN2D
ATN1	STAT1	MTMR12	CCPG1	BHLHB5	EHHADH
BACE1		NFKBIA	CD44	BMP2	ERBB2
BCL2		NPR3	CHD4	C1orf183	G6PC
BCL6		SH3BP4	CSF1	CCND1	RUNX3
BDNF		SUB1	DDX5	CCND2	TLR4
BRCA1		TIAL1	DMPK	CCNE2
C1orf61		TLR4	ESR1	CD40
CBX7		TNF	FABP4	CDC6
CCND1		ZFR	FASN	CDK4
CCNE1			FGFR1	CDK6
CCNE2			FOSB	CDK8
CCNF			GFAP	CDKN1A
CD46			GULP1	CDKN2A
CDC14A			HOXD10	CENTG1
CDC25A			ID4	CHFR
CDH1			IGF1R	CHRD
CDK6			INPPL1	CIB1
CDKN1A			ITPR1	CLOCK
CDKN2A			LRG1	COL1A1
CDKN2D			MAP2K1	COL4A2
CEBPA			MAPK1	COL5A3
CEBPB			MAPK9	COMP
CFH			MBD4	COX8A
CHEK1			MED1	CPEB2
CHRD			MERTK	CPEB4
CISH			MEST	CREB1
COL9A1			MEST	CSF1
COMP			MLC1	CTDSP2
COX8A			MYCN	CTGF
CREB1			NCOA6	CTNNBIP1
DCC			NIT1	CXCL12
DCX			OPRS1	DDX20
DDIT3			PIAS1	DES
DICER1			PPARG	DGCR8
DNMT1			PTPRN2	DICER1
E2F1			RASA1	DLL1
E2F3			RASA1	DNAH8
EDG6			RB1	DUSP2
EIF2C1			RB1	EGR1
EIF2C2			RHOC	EIF2C1
ELAVL1			RHOD	EIF2C2
ELAVL2			ROCK1	EZH2
ELSPBP1			RUNX2	FBXW7
EPHA3			SOX4	FH
EPHB2			SOX4	G6PD
ERBB2			SYNGAP1	GARS
ETS1			TACSTD1	GEMIN4
FABP7			TAF10	GHRHR
FGF8			THBS1	GSK3B
FMR1			TNC	HDAC4
FOXG1			TNC	HDAC9
FOXO1			TP53	HMGA1
FOXP1			ZNF828	HMGA2
FOXP2				HOXA5
FRAP1				HRSP12
FUT4				HUWE1
FZR1				IFNG
GFAP				IL17A
GHRHR				IL2
GRB2				IL6
GRIA1				JUN
GRIN2A				KLF2
GRIN2B				KLF4
GSX2				LIF
GYPE				MAP2
HDAC9				MAP3K12
HES1				MAP3K2
HGF				MAPK3
HGFAC				MAPK8
HMOX1				MARK2
HRB				MAS1
HRSP12				ME1
IFNG				MECP2
IGF1R				METAP2
IGFALS				MMP9
IL1B				MRGPRX3
IL23A				MTDH
IL8				MYC
ITGB1				MYOD1
JUN				NFKB1
KIF23				NFYC
KRAS				NOG
LARP6				NPC1
LIN28				NPHS2
LIN28B				PDXP
MAP2K1				PI3
MAPK3				PIK3CA
MEIS2				PIWIL1
MET				PLAG1
MMP13				POU4F2
MMP9				PPFIBP2
MPI				PTEN
MYC				PTP4A1
MYCN				R3HDM1
MYD88				RB1
NELL1				RDX
NEUROD1				RNASEN
NEUROG3				RRBP1
NF2				RUNX2
NFKB1				SCPEP1
NOG				SH3BP4
NOTCH1				SMAD1
NPAT				SMAD3
NR2E1				SOX6
NRGN				SSSCA1
NTRK3				SULT2A1
ODZ1				TACSTD1
PAK3				TAF12
PAX6				TAF9
PDGFA				TARBP2
PDGFRB				TGFB1
PDXP				TGFB3
PMP22				TGFBR2
POU2F2				UBL4A
PRDM1				VAMP2
PROM1				WT1
PTBP2				XPO5
PXMP2				ZCCHC11
RAB34
RARA
RASSF1
RCOR1
REST
RHD
RNASEN
ROBO1
ROS1
RPE
RUNX1
S100B
SIRT1
SLC22A3
SLC27A4
SLC7A5
SOAT1
SOCS2
SOX2
SRF
STAT3
STAT6
STMN1
SYK
SYNE1
TFRC
TGIF2
TLR2
TLR4
TP53
TP73
TRPM3
TSPAN12
UNC5C
VEGFA
WEE1
ZNF828
